# Supplementary material for: Formation and Thermal Stability of Ordered Self-Assembled Monolayers by the Adsorption of Amide-Containing Alkanethiols on Au(111)
Source: MDPI journal article supplement (doi:10.3390/ijms24043241), 2023-02-07
Supplement: s1 [file s1]

# SUPPLEMENTARY MATERIALS

## **Formation and Thermal Stability of Ordered Self-Assembled Monolayers by Adsorption of Amide-Containing Alkanethiols on Au(111)**

Young Ji Son<sup>1,†</sup>, Jin Wook Han<sup>1,†</sup>, Hungu Kang<sup>1,2</sup>, Sicheon Seong<sup>1</sup>, Seilki Han<sup>1</sup>, Shoichi Maeda<sup>3</sup>,  
Shunta Chikami<sup>3</sup>, Tomohiro Hayashi<sup>3</sup>, Masahiko Hara<sup>4</sup>, Jaegeun Noh<sup>1,5,\*</sup>

<sup>1</sup>Department of Chemistry, Hanyang University, 222 Wangsimni-ro, Seongdong-gu, Seoul 04763, Korea

<sup>2</sup>Department of Chemistry, Korea University, 145 Anam-ro, Seongbuk-gu, Seoul 02841, Korea

<sup>3</sup>Department of Materials Science and Engineering, School of Materials and Chemical Technology, Tokyo Institute of Technology, 4259 Nagatsuta-cho, Midori-ku, Yokohama, Kanagawa 226-8503, Japan

<sup>4</sup> Department of Electronic Chemistry, Tokyo Institute of Technology, 4259 Nagatsuta, Midoriku, Yokohama 226-8502, Japan

<sup>5</sup>Research Institute for Convergence of Basic Science, Hanyang University, 222 Wangsimni-ro, Seongdong-gu, Seoul 04763, Korea

\* Correspondence: jgnoh@hanyang.ac.kr

† These authors contributed equally to this work.

## 1. Synthesis of N-(2-mercaptoethyl)heptanamide (MEHA)

### 1.1. Materials

Heptanoic acid ( $\geq 99.0\%$ , Sigma-Aldrich), N-hydroxysuccinimide (NHS;  $\geq 98.0\%$ , TCI), N, N'-dicyclohexylcarbodiimide (DCC;  $\geq 98.0\%$ , TCI), Dichloromethane (DCM;  $\geq 99.8\%$ , Sigma-Aldrich), 2-Aminoethanethiol ( $\geq 95.0\%$ , TCI), and triethylamine ( $\geq 99.0\%$ , Sigma-Aldrich) were purchased and used without further purification.

### 1.2. Synthesis of MEHA

2,5-dioxopyrrolidin-1-yl heptanoate: At 0 °C, DCC (6.190 g, 30 mmol) was added to a dioxane solution (500 mL) containing heptanoic acid (3.9056 g, 30 mmol) and NHS (3.452 g, 30 mmol), and the mixture was stirred at 20 °C overnight. 2,5-dioxopyrrolidin-1-yl heptanoate, a white solid obtained by evaporating the reaction mixture, was then used for the subsequent procedure without further purification.

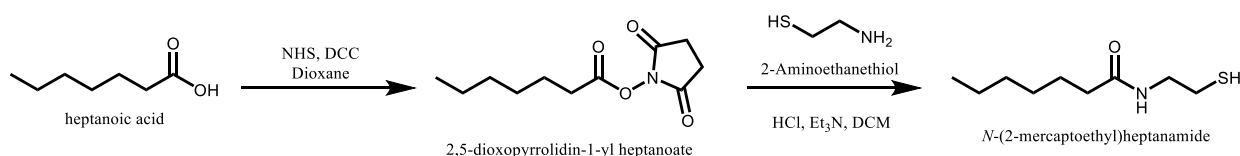

**Figure S1.** Synthetic schematic illustration of MEHA

N-(2-mercaptoethyl)heptanamide (MEHA): 2,5-dioxopyrrolidin-1-yl heptanoate and triethylamine (8.31 mL, 60 mmol) were added to a DCM solution (350 mL) and stirred for 4 h at 20 °C.

The reaction mixture was washed twice in 100 mL of 1 N aqueous HCl, dried over Na<sub>2</sub>SO<sub>4</sub>, and then evaporated to dryness. The residue was purified with an eluent (hexane: EA=1:1) over silica gel, and the second layer was isolated from the column and evaporated to produce MEHA as a white solid (1.4114 g, 24.9 %). <sup>1</sup>H NMR (400 MHz, CDCl<sub>3</sub>): δ (ppm) 5.832 (br, 1H), 3.463-3.416 (q, 2H), 2.212-2.174 (t, 2H), 1.672-1.598 (m, 2H), 1.356-1.242 (m, 7H), 0.902-0.868 (t, 3H).

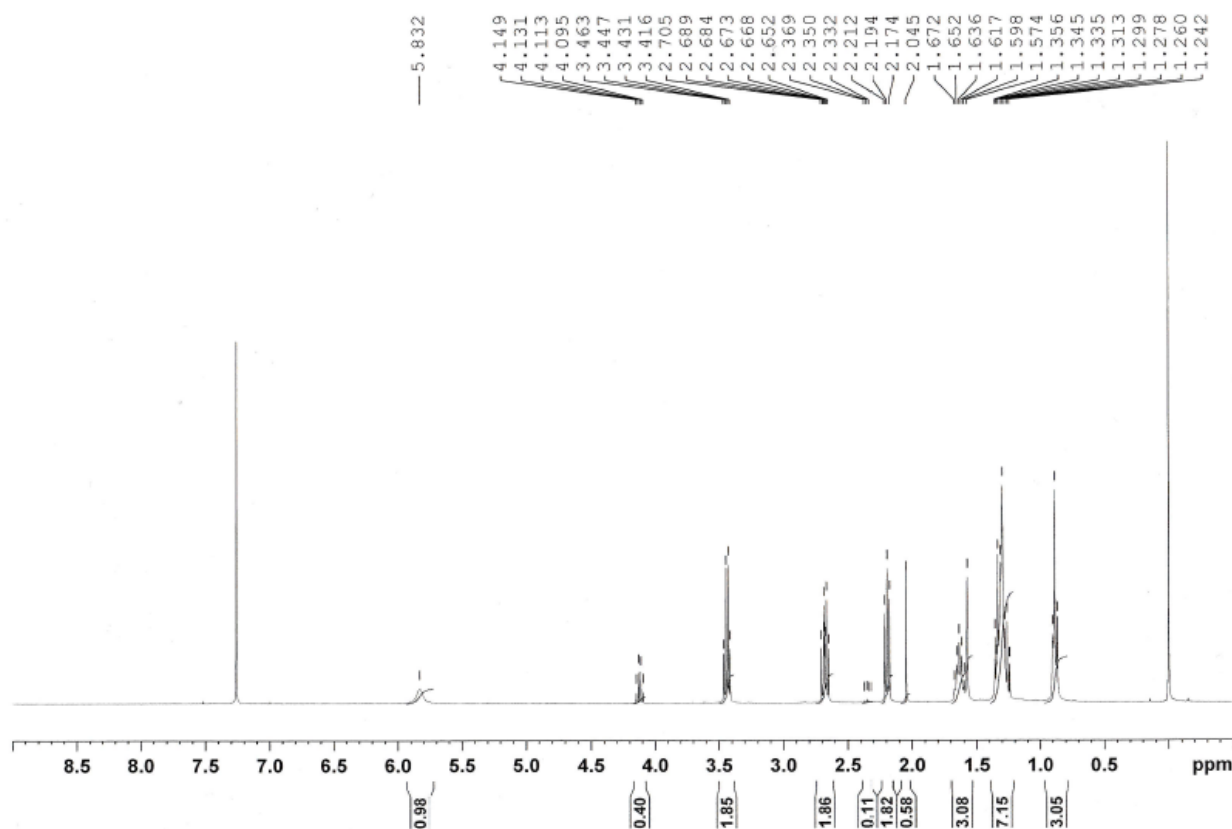

**Figure S2.** <sup>1</sup>H NMR Spectrum (400 MHz, CDCl<sub>3</sub>) of MEHA.
